# Supplementary material
Source: PubMed Central journal article supplement (PMC5738629)
Supplement: la7b03153_si_001.pdf [file la7b03153_si_001.pdf]

## Supplementary Information

### Probing the surface charge on the basal planes of Kaolinite particles with high resolution Atomic Force Microscopy

N. Kumar<sup>1†</sup>, M. P. Andersson<sup>2</sup>, D. van den Ende<sup>1</sup>, F. Mugele<sup>1</sup> and I. Siretanu<sup>1\*</sup>

<sup>1</sup>Physics of Complex Fluids Group, MESA+ Institute for nanotechnology, University of Twente, PO Box 217, 7500 AE Enschede, The Netherlands

<sup>2</sup>Nano-Science Center, Department of Chemistry, University of Copenhagen, Universitetsparken 5, 2100 Copenhagen, Denmark

\* Corresponding author, email: [i.siretanu@utwente.nl](mailto:i.siretanu@utwente.nl)

† present address: Delft University of Technology, Department of Chemical Engineering, Van der Maasweg 9, 2629 HZ Delft, The Netherlands

### Effect of pH: force and charge maps on gibbsite facet

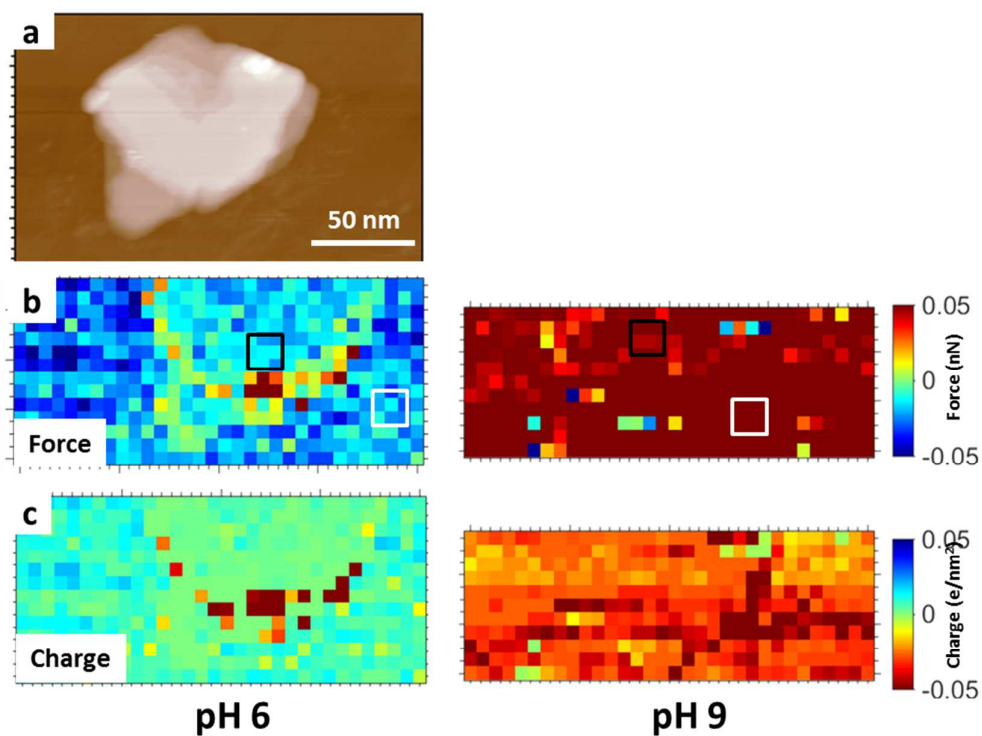

**Figure S1** (a) Topography image of kaolinite particle adsorbed on sapphire imaged under 10mM NaCl solution (b) Force maps showing tip-sample interaction forces on kaolinite under 10mM NaCl solution at pH 6 and 9. Note: The maps are shown at 1 nm distance from the surface. (c) Surface charge maps calculated by analysing the tip sample interaction forces with DLVO theory. (Tip parameters:  $Q = 2.37$ ,  $f_0 = 17.06$  kHz,  $K = 0.448$  N/m,  $A_{tip} = 1018 \pm 12.5$  nm<sup>2</sup>)

## Effect of pH: force and charge maps on gibbsite facet

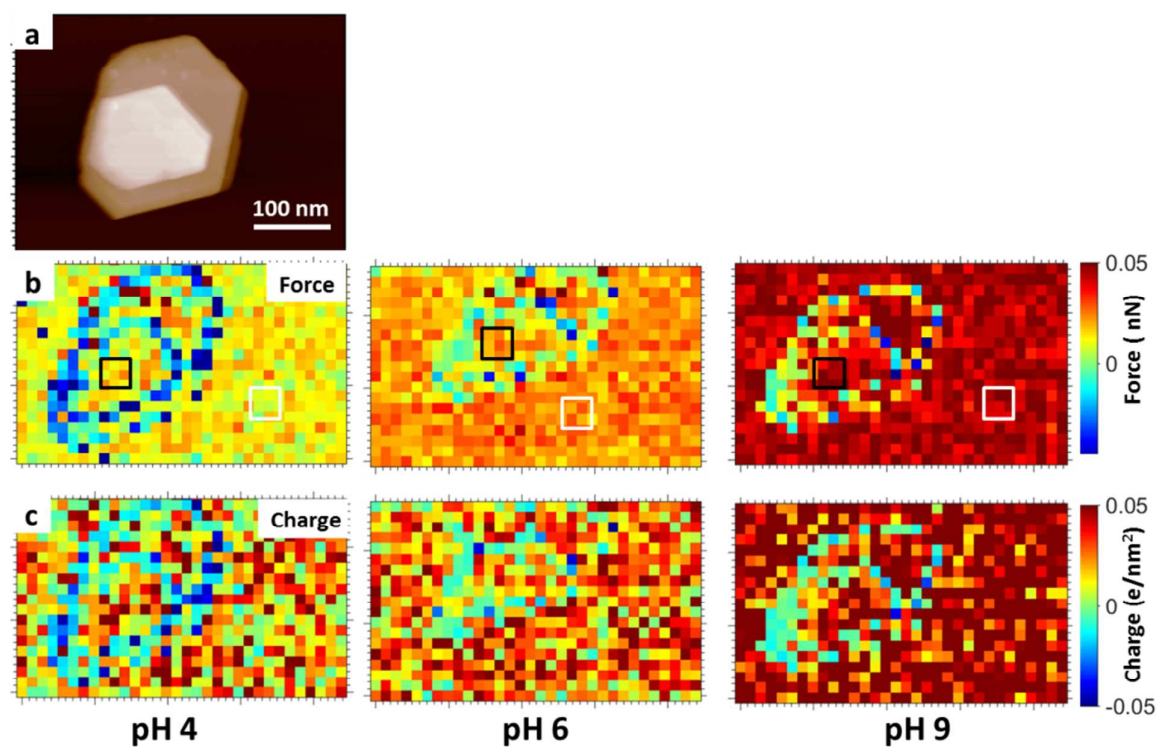

**Figure S2** (a) Topography image of kaolinite particle adsorbed on mica imaged under 10 mM NaCl, pH 6 solution (b) Force maps showing tip sample interaction forces on kaolinite under 10mM NaCl solution at pH 4, 6 and 9. Note: The maps are shown at 1 nm distance from the surface. (c) Surface charge maps calculated by analysing the tip sample interaction forces with DLVO theory. (Tip parameters:  $Q = 2.16$ ,  $f_0 = 16.97$  kHz,  $K = 0.367$  N/m,  $A_{ip} = 531 \pm 12.5$  nm<sup>2</sup>).

### Effect of CaCl<sub>2</sub> solutions: force and charge maps on gibbsite facet

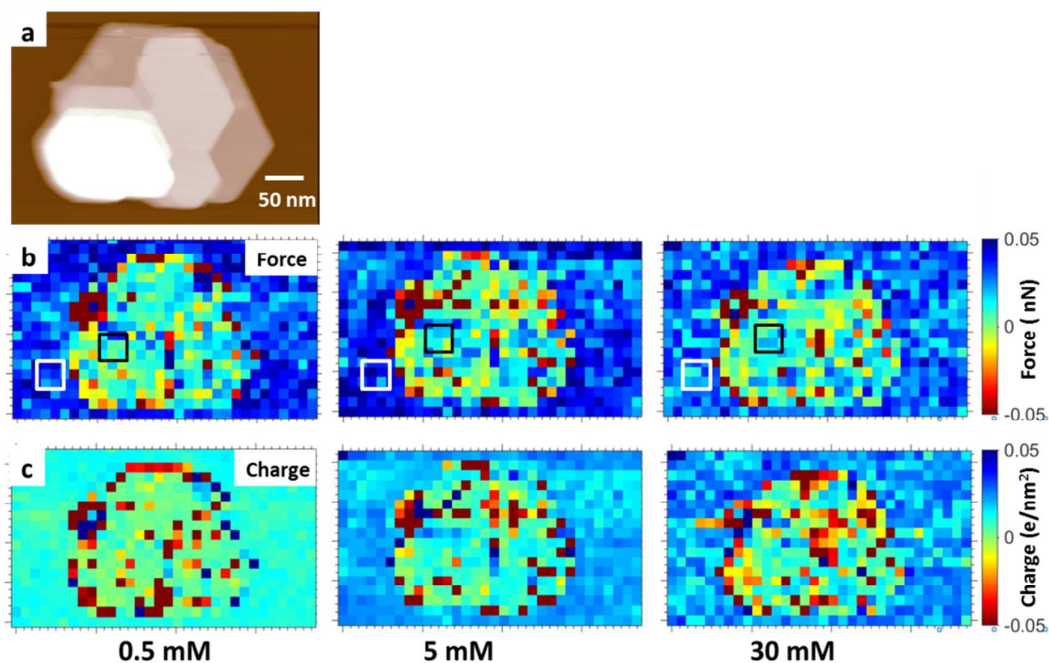

**Figure S3** (a) Topography image of kaolinite particle adsorbed on sapphire imaged under 10mM CaCl<sub>2</sub> solution (b) Force maps showing tip sample interaction forces on kaolinite under different (0.5, 5, and 30mM) CaCl<sub>2</sub> salt concentrations. Note: The maps are shown at 1 nm distance from the surface. (b) Surface charge maps calculated by analysing the interaction force curves with DLVO theory. (Tip parameters:  $Q = 2.94$ ,  $f_0 = 22,67$  kHz,  $K = 0.71$  N/m,  $A_{tip} = 314 \pm 12.5$  nm<sup>2</sup>)

### SEM Images of AFM tips

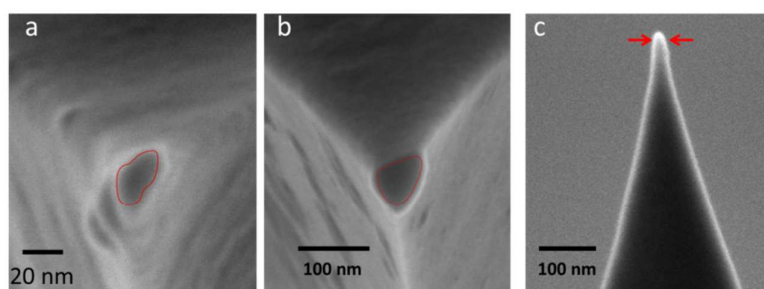

**Figure S4** SEM images of the AFM tips used for different experiments. (a)  $A_{tip} = 531 \pm 12.5$  nm<sup>2</sup> for measurements on the silica facet and (b)  $A_{tip} = 1018 \pm 12.5$  nm<sup>2</sup> for measurements on the gibbsite facet of the kaolinite particles.

**Surface potential:**

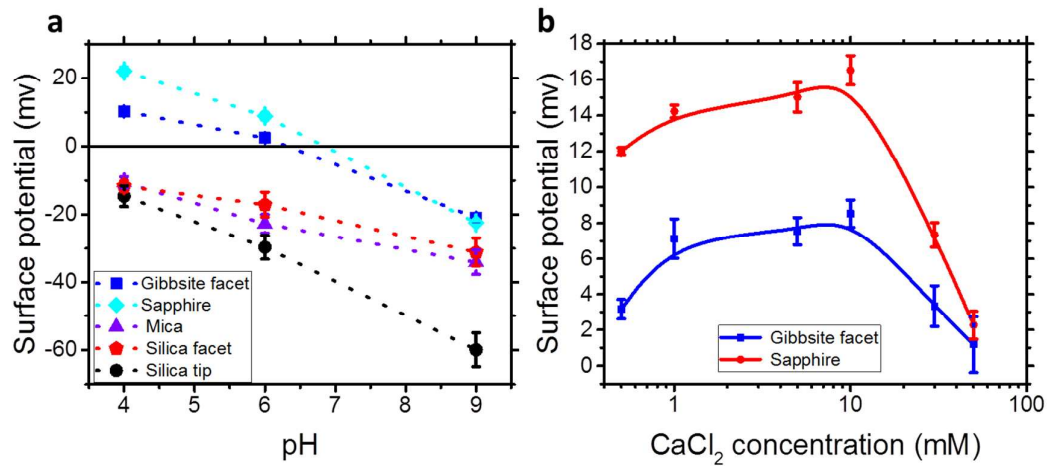

**Figure S5:** Surface potential of (a) mica, silica tip, sapphire and the two facets of kaolinite particle as a function of pH and (b) Sapphire and the gibbsite facet as a function of CaCl<sub>2</sub> salt concentration. Note: These potential values are calculated on the areas marked on the force maps shown in Figure 1, 3, S1, S2, and S3.
